# Supplementary material
Source: PubMed Central journal article supplement (PMC3240755)
Supplement: supp_amiajnl-2011-000214_jamia-suppl-revision-10Apr2011.pdf [file supp_amiajnl-2011-000214_jamia-suppl-revision-10Apr2011.pdf]

A novel signal detection algorithm for identifying hidden drug-drug interactions in adverse event reports

Nicholas P. Tatonetti<sup>1,2</sup>, Guy Haskin Fernald<sup>1,2</sup>, and Russ B. Altman<sup>2,\*</sup>

<sup>1</sup>Biomedical Informatics Training Program, <sup>2</sup>Departments of Bioengineering, Genetics, and Medicine, Stanford University, Stanford, CA, USA

\*Corresponding Author

Russ B. Altman

318 Campus Drive S172, MC: 5444

Stanford, CA 94305-5444

Tel: (650) 725-3394

Fax: (650) 723-8544

Email: [russ.altman@stanford.edu](mailto:russ.altman@stanford.edu)

Key words: drug interactions, signal detection analysis, adverse effects, pharmacoepidemiology

## Supplemental Material

**Table S1** Novel drug-drug interaction predictions for cholesterol related adverse events.

| Rank | Drug A                  | Drug B              | Score        | Minimum Randomization Rank | Known DDI exists |
|------|-------------------------|---------------------|--------------|----------------------------|------------------|
| 19   | DICLOFENAC SODIUM       | IMMUCYST            | 10.963998133 | 1670                       |                  |
| 23   | DACTINOMYCIN            | VINCRISTINE SULFATE | 8.0782106128 | 130                        |                  |
| 32   | LEUPROLIDE ACETATE      | ZOMETA              | 5.4249893872 | 44                         |                  |
| 35   | RAPTIVA                 | SORIATANE           | 5.4249893872 | 309                        |                  |
| 52   | CHANTIX                 | MOTRIN              | 3.58595      | 2106                       |                  |
| 53   | FOSAMAX                 | ZETIA               | 3.58595      | 1323                       |                  |
| 63   | AVASTIN                 | DOXORUBICIN HCL     | 2.61108109   | 2411                       |                  |
| 69   | ARICEPT                 | ZOLOFT              | 2.1595157296 | 2600                       |                  |
| 80   | LANTUS                  | NPH INSULIN         | 1.3925125    | 976                        |                  |
| 92   | EFFEXOR                 | LORAZEPAM           | 0.6613608175 | 1799                       |                  |
| 87   | ACTONEL                 | NEXIUM              | 0.6613608175 | 2898                       |                  |
| 89   | AVONEX                  | LASIX               | 0.6613608175 | 2366                       |                  |
| 90   | CHANTIX                 | PREVACID            | 0.6613608175 | 2102                       |                  |
| 93   | KEPPRA                  | VALPROIC ACID       | 0.6009942112 | 1035                       |                  |
| 94   | PAROXETINE HCL          | RISPERDAL           | 0.6009942112 | 123                        | SIGNIFICANT      |
| 102  | CITALOPRAM HYDROBROMIDE | RISPERDAL           | 0.1186106128 | 2048                       |                  |
| 103  | LAMICTAL                | LEVETIRACETAM       | 0.1186106128 | 1013                       |                  |
| 105  | TEGRETOL                | VALPROATE SODIUM    | 0.1186106128 | 128                        |                  |
| 107  | IBUPROFEN               | LYRICA              | 0.07645      | 1257                       |                  |

**Table S2** Novel drug-drug interaction predictions for depression related adverse events.

| Rank | Drug A       | Drug B       | Score        | Minimum Randomization Rank | Known DDI exists |
|------|--------------|--------------|--------------|----------------------------|------------------|
| 14   | THEOPHYLLINE | TRAMADOL HCL | 25.279159036 | 19                         |                  |
| 19   | MODAFINIL    | XYREM        | 23.698738925 | 20                         |                  |
| 41   | TEGRETOL-XR  | TOPAMAX      | 14.2336125   | 151                        |                  |
| 75   | LORAZEPAM    | RISPERDAL    | 7.3862523656 | 169                        |                  |
| 91   | HYDROCODONE  | ASPIRIN      | 6.0242874525 | 2933                       |                  |

**Table S2** Novel drug-drug interaction predictions for depression related adverse events.

| Rank | Drug A                  | Drug B              | Score        | Minimum Randomization Rank | Known DDI exists |
|------|-------------------------|---------------------|--------------|----------------------------|------------------|
| 95   | ALPRAZOLAM              | TRAZODONE HCL       | 5.7345792775 | 2704                       |                  |
| 100  | METHOTREXATE            | ZOFRAN              | 5.5247       | 135                        |                  |
| 125  | CLOZAPINE               | RISPERDAL<br>CONSTA | 4.2096       | 1962                       |                  |
| 165  | DIAZEPAM                | METHADONE HCL       | 2.5778852165 | 177                        |                  |
| 173  | ALPRAZOLAM              | METHADOSE           | 2.35472763   | 192                        |                  |
| 197  | ASPIRIN                 | BUPROPION HCL       | 1.67875      | 2568                       |                  |
| 198  | IBUPROFEN               | VALPROIC ACID       | 1.67875      | 1118                       |                  |
| 212  | CLONAZEPAM              | METHADONE HCL       | 1.2731707225 | 1984                       |                  |
| 274  | LEVOTHYROXINE<br>SODIUM | METFORMIN HCL       | 0.1001339564 | 937                        |                  |

**Table S3** Novel drug-drug interaction predictions for diabetes related adverse events.

| Rank | Drug A            | Drug B                  | Score        | Minimum Randomization Rank | Known DDI exists |
|------|-------------------|-------------------------|--------------|----------------------------|------------------|
| 38   | PAROXETINE<br>HCL | PRAVASTATIN SODIUM      | 11.351896014 | 62                         |                  |
| 72   | DIOVAN HCT        | HYDROCHLOROTHIAZID<br>E | 7.1786599539 | 89                         |                  |
| 94   | CRESTOR           | PREVACID                | 4.7923771645 | 148                        |                  |
| 107  | DEFERAL           | EXJADE                  | 3.97220625   | 129                        |                  |
| 159  | COUMADIN          | VESICARE                | 0.8928376683 | 169                        |                  |
| 160  | DEXAMETHASO<br>NE | THALIDOMIDE             | 0.8928376683 | 168                        | CRITICAL         |
| 170  | FOSAMAX           | VOLTAREN                | 0.5033125    | 1138                       |                  |
| 175  | ALIMTA            | DEXAMETHASONE           | 0.2442375    | 197                        |                  |

**Table S4** Novel drug-drug interaction predictions for hepatotoxicity related adverse events.

| Rank | Drug A                     | Drug B             | Score        | Minimum Randomization Rank | Known DDI exists |
|------|----------------------------|--------------------|--------------|----------------------------|------------------|
| 1    | BRICANYL                   | IRESSA             | 30.761919838 | 2150                       |                  |
| 2    | FOSAMAX                    | PREMPRO            | 25.8265      | 33                         |                  |
| 4    | CITALOPRAM<br>HYDROBROMIDE | NORDETTE-28        | 17.7273      | 6                          |                  |
| 16   | AVASTIN                    | DOXORUBICIN<br>HCL | 6.0833024736 | 155                        |                  |
| 18   | AMLODIPINE                 | NORVASC            | 5.6936       | 26                         |                  |

**Table S4** Novel drug-drug interaction predictions for hepatotoxicity related adverse events.

| Rank | Drug A       | Drug B            | Score        | Minimum Randomization Rank | Known DDI exists |
|------|--------------|-------------------|--------------|----------------------------|------------------|
| 28   | ARELIA       | THALOMID          | 3.9458934999 | 2448                       |                  |
| 56   | GLUCOPHAGE   | GLYBURIDE         | 1.78216407   | 1185                       |                  |
| 57   | FLUOROURACIL | METHOTREXATE      | 1.7645512368 | 225                        |                  |
| 72   | FEMARA       | TAMOXIFEN CITRATE | 1.216875     | 196                        |                  |
| 89   | CANCIDAS     | ZOSYN             | 0.7601349905 | 2105                       |                  |
| 92   | TEGRETOL     | ZYPREXA           | 0.6264111051 | 197                        |                  |
| 112  | LETROZOLE    | ZOMETA            | 0.0342       | 916                        |                  |

**Table S5** Novel drug-drug interaction predictions for hypertension related adverse events.

| Rank | Drug A                   | Drug B                 | Score         | Minimum Randomization Rank | Known DDI exists |
|------|--------------------------|------------------------|---------------|----------------------------|------------------|
| 11   | ACCUTANE                 | ERYTHROMYCIN           | 12.9441280575 | 13                         |                  |
| 20   | HUMALOG                  | ILETIN                 | 8.3583828939  | 41                         |                  |
| 22   | ACETAMINOPHEN            | SERTRALINE             | 7.9111099109  | 2958                       |                  |
| 24   | FOSAMAX                  | PEPCID                 | 7.6857867497  | 42                         |                  |
| 26   | PIROXICAM                | SULFASALAZINE          | 7.4749        | 456                        |                  |
| 28   | PAROXETINE HCL           | PRAVASTATIN SODIUM     | 6.9026972967  | 518                        |                  |
| 31   | MEDROL                   | PROGRAF                | 6.1304        | 823                        |                  |
| 32   | CERVIDIL                 | TERBUTALINE SULFATE    | 6.1304        | 2273                       |                  |
| 37   | ACETYLSALICYLIC ACID SRT | SIMVASTATIN            | 5.7928886426  | 2947                       |                  |
| 39   | AVANDIA                  | LOTREL                 | 5.5195654559  | 2543                       |                  |
| 40   | ALEVE                    | PRILOSEC               | 5.4928030336  | 2821                       |                  |
| 45   | CARBOPLATIN              | DOXORUBICIN HCL        | 4.9343323583  | 2346                       |                  |
| 48   | BOTULISM AB              | BOTULISM ANTITOXIN ABE | 4.6644008822  | 215                        |                  |
| 53   | ALTACE                   | LIPITOR                | 4.4918185151  | 124                        |                  |
| 59   | HYDROMORPHONE HCL        | PRIALT                 | 4.13405       | 66                         |                  |
| 62   | ACCUTANE                 | ZITHROMAX              | 3.87282274559 | 73                         |                  |

**Table S4** Novel drug-drug interaction predictions for hepatotoxicity related adverse events.

| Rank | Drug A               | Drug B              | Score       | Minimum Randomization Rank | Known DDI exists |
|------|----------------------|---------------------|-------------|----------------------------|------------------|
| 73   | AUGMENTIN '125'      | CLARITHROMYCIN      | 3.128437679 | 2663                       | 8                |
| 77   | CERVIDIL             | PITOCIN             | 2.789003341 | 2274                       | 4                |
| 81   | NORVASC              | TENORMIN            | 2.719025    | 109                        |                  |
| 83   | ALBUTEROL            | AVONEX              | 2.580620864 | 140                        | 2                |
| 88   | DOCETAXEL            | HERCEPTIN           | 2.3783492   | 1769                       |                  |
| 91   | ALBUTEROL            | PULMICORT FLEXHALER | 2.09677     | 92                         |                  |
| 94   | ALPRAZOLAM           | METHADONE HCL       | 2.001612170 | 98                         | 2                |
| 95   | ACCUTANE             | RITALIN             | 1.9878      | 2997                       |                  |
| 101  | CRESTOR              | DIOVAN HCT          | 1.712472289 | 106                        | 1                |
| 105  | OXYCODONE HCL        | ALPRAZOLAM          | 1.525795894 | 150                        |                  |
| 113  | LEVOTHYROXINE SODIUM | SIMVASTATIN         | 1.363038485 | 118                        | 3                |
| 125  | PAXIL                | ROCEPHIN            | 0.985829767 | 318                        | 3                |
| 130  | GENOTROPIN           | SYNTHROID           | 0.901193534 | 1368                       | 3                |
| 131  | NEUPOGEN             | PROCRIT             | 0.874902370 | 411                        | 44               |
| 133  | LANSOPRAZOLE         | WARFARIN SODIUM     | 0.815145409 | 1050                       |                  |
| 134  | LETAIRIS             | REVATIO             | 0.795225066 | 243                        |                  |
| 144  | COUMADIN             | EVISTA              | 0.367475800 | 2066                       | 2                |
| 149  | PHENYTOIN            | TOPAMAX             | 0.310245082 | 233                        | 8                |
| 158  | HUMIRA               | OMEPRAZOLE          | 0.107849883 | 415                        | 2                |

**Table S6** Novel drug-drug interaction predictions for liver dysfunction related adverse events.

| Rank | Drug A        | Drug B       | Score         | Minimum Randomization Rank | Known DDI exists |
|------|---------------|--------------|---------------|----------------------------|------------------|
| 2    | LAMOTRIGINE   | XENICAL      | 40.95530625   | 9                          |                  |
| 4    | DILANTIN      | ZOLOFT       | 25.0606371418 | 8                          |                  |
| 7    | DILANTIN      | REBIF        | 22.084656827  | 21                         |                  |
| 8    | EFFEXOR XR    | VIOXX        | 20.364175     | 29                         |                  |
| 10   | METRONIDAZOLE | PIPERACILLIN | 17.9636       | 760                        |                  |
| 14   | AVONEX        | LASIX        | 15.0088097365 | 2303                       |                  |

**Table S4** Novel drug-drug interaction predictions for hepatotoxicity related adverse events.

| Rank | Drug A              | Drug B       | Score         | Minimum Randomization Rank | Known DDI exists |
|------|---------------------|--------------|---------------|----------------------------|------------------|
| 15   | DIGOXIN             | MICARDIS     | 14.6523529501 | 98                         |                  |
| 21   | CANCIDAS            | ZOSYN        | 10.4876741426 | 2156                       |                  |
| 35   | KEPPRA              | ZONEGRAN     | 6.8451109129  | 59                         |                  |
| 41   | NEUPOGEN            | PROCRIT      | 5.74396335065 | 46                         |                  |
| 44   | LANTUS              | NPH INSULIN  | 5.149375      | 132                        |                  |
| 92   | CYLERT              | PAXIL        | 1.7942987681  | 1780                       |                  |
| 106  | AVANDAMET           | GLYBURIDE    | 1.1169944188  | 489                        |                  |
| 108  | LOTENSIN            | VIOXX        | 1.0784714651  | 112                        |                  |
| 117  | BEXTRA              | METHOTREXATE | 0.8422125     | 307                        |                  |
| 118  | LAMOTRIGINE         | NEURONTIN    | 0.8359408902  | 121                        |                  |
| 133  | DIAZEPAM            | HYDROCODONE  | 0.5624        | 1669                       |                  |
| 136  | AMLODIPINE BESYLATE | DIOVAN       | 0.5197505716  | 482                        |                  |
| 139  | ABRAXANE            | HERCEPTIN    | 0.4040597365  | 2837                       |                  |
| 141  | FEIBA VH IMMUNO     | NOVOSEVEN    | 0.4040597365  | 1447                       |                  |
| 142  | GLYBURIDE           | LEVAQUIN     | 0.4040597365  | 1246                       | SIGNIFICANT      |
| 148  | FLEXERIL            | ULTRAM       | 0.3130618894  | 1416                       |                  |
| 153  | DOXYCYCLINE         | ORTHO EVRA   | 0.2318760588  | 1593                       |                  |
| 160  | BEXTRA              | ZETIA        | 0.0889525897  | 2222                       |                  |

**Table S7** Novel drug-drug interaction predictions for renal impairment related adverse events.

| Rank | Drug A               | Drug B          | Score        | Minimum Randomization Rank | Known DDI exists |
|------|----------------------|-----------------|--------------|----------------------------|------------------|
| 5    | GLEEVEC              | INSULIN         | 18.288155607 | 1429                       |                  |
|      |                      |                 | 3            |                            |                  |
| 6    | AUGMENTIN            | CLARITHROMYCIN  | 18.159991735 | 2801                       |                  |
| 7    | ACCUTANE             | ZITHROMAX       | 17.907911543 | 25                         |                  |
|      |                      |                 | 1            |                            |                  |
| 15   | AVANDIA              | REGULAR INSULIN | 9.6486       | 2760                       |                  |
| 16   | ONCASPAR             | VINCRISTINE     | 8.6471988948 | 572                        |                  |
|      |                      |                 | 5            |                            |                  |
| 18   | PREDNISOLONE ACETATE | PROGRAF         | 8.4705664131 | 25                         |                  |
| 26   | SOLU-MEDROL          | THYMOGLOBULIN   | 6.2129886087 | 216                        |                  |
| 31   | COUMADIN             | TARCEVA         | 5.4942713451 | 2134                       |                  |
| 32   | AVANDAMET            | AVANDIA         | 5.4920487133 | 216                        |                  |
|      |                      |                 | 2            |                            |                  |
| 38   | AVASTIN              | HERCEPTIN       | 4.83876      | 2864                       |                  |

**Table S4** Novel drug-drug interaction predictions for hepatotoxicity related adverse events.

| Rank | Drug A               | Drug B               | Score        | Minimum Randomization Rank | Known DDI exists |
|------|----------------------|----------------------|--------------|----------------------------|------------------|
| 55   | COZAAR               | HYZAAR               | 3.6161245389 | 2120                       |                  |
| 56   | SUTENT               | TRAMADOL HCL         | 3.6161245389 | 194                        |                  |
| 58   | CHANTIX              | LEVOTHYROXINE SODIUM | 3.53851      | 2389                       |                  |
| 59   | PREDNISONE TAB       | REVLIMID             | 3.5064475461 | 424                        |                  |
| 60   | AVANDIA              | HUMALOG              | 3.4903       | 2771                       |                  |
| 63   | AVANDIA              | VYTORIN              | 3.2942206401 | 2759                       |                  |
| 70   | HUMIRA               | IMURAN               | 3.1692666951 | 1336                       |                  |
| 71   | EZETIMIBE            | SIMVASTATIN          | 3.0644164854 | 1658                       |                  |
| 78   | ENBREL               | MEDROL               | 2.7980011257 | 1755                       |                  |
| 82   | AVELOX               | COUMADIN             | 2.6448246093 | 2721                       | SIGNIFICANT      |
| 83   | LAMICTAL             | VALIUM               | 2.5967655501 | 1114                       |                  |
| 85   | LEVAQUIN             | PREDNISONE           | 2.5412245784 | 95                         |                  |
| 91   | IMITREX              | PROZAC               | 2.3132258418 | 1237                       | SIGNIFICANT      |
| 92   | ALLOPURINOL          | TREANDA              | 2.2473746288 | 114                        |                  |
| 94   | DETROL LA            | OXYBUTYNIN CHLORIDE  | 2.23515      | 1944                       |                  |
| 102  | AVANDARYL            | AVANDIA              | 2.0596585878 | 2782                       |                  |
| 107  | IRINOTECAN HCL       | MITOMYCIN            | 1.9767357021 | 187                        |                  |
| 109  | PROZAC               | REMERON              | 1.9425494148 | 357                        |                  |
| 111  | AMOXICILLIN          | LAMICTAL             | 1.9056368753 | 3116                       |                  |
| 115  | CLONAZEPAM           | OLANZAPINE           | 1.74756      | 2260                       |                  |
| 117  | LIPITOR              | MULTIVITAMIN         | 1.6155646347 | 1001                       |                  |
| 118  | AVANDIA              | GLUCOTROL            | 1.5881971882 | 2774                       |                  |
| 120  | CLONAZEPAM           | NEURONTIN            | 1.56408      | 2356                       |                  |
| 122  | ADVAIR DISKUS 100/50 | PREDNISONE TAB       | 1.534981933  | 3252                       |                  |
| 123  | SUSTIVA              | VIRAMUNE             | 1.4628875    | 195                        |                  |
| 124  | CLARITHROMYCIN       | WARFARIN SODIUM      | 1.4485570095 | 2288                       | CRITICAL         |
| 126  | CHANTIX              | LYRICA               | 1.417525     | 2384                       |                  |
| 129  | IRINOTECAN HCL       | VECTIBIX             | 1.3311505565 | 1188                       |                  |
| 130  | LIPITOR              | OMEPRAZOLE           | 1.2983649519 | 997                        |                  |
| 133  | CYCLOSPORINE         | PROGRAF              | 1.119712596  | 2046                       | SIGNIFICANT      |
| 136  | CRESTOR              | MICARDIS             | 0.9995799423 | 2096                       |                  |

**Table S4** Novel drug-drug interaction predictions for hepatotoxicity related adverse events.

| Rank | Drug A   | Drug B          | Score        | Minimum Randomization Rank | Known DDI exists |
|------|----------|-----------------|--------------|----------------------------|------------------|
| 137  | KEPPRA   | ZONEGRAN        | 0.8844494928 | 1223                       |                  |
| 138  | AVELOX   | SYNTHROID       | 0.8707954315 | 2710                       |                  |
| 143  | ASPIRIN  | ORTHO EVRA      | 0.6989950879 | 3328                       |                  |
| 144  | AVONEX   | PREDNISONE TAB  | 0.6656158008 | 2686                       |                  |
| 151  | PLAVIX   | REOPRO          | 0.5932615431 | 452                        |                  |
| 147  | ALKERAN  | PREDNISONE      | 0.5932615431 | 3133                       |                  |
| 150  | GLEEVEC  | PREDNISOLONE    | 0.5932615431 | 1426                       |                  |
| 153  | GEODON   | LEXAPRO         | 0.5077856210 | 177                        |                  |
| 154  | CLIMARA  | SYNTHROID       | 0.4466721528 | 2277                       | SIGNIFICANT      |
| 155  | EXCEDRIN | ORTHO EVRA      | 0.41796      | 1674                       |                  |
| 157  | PERMAX   | SINEMET         | 0.3198375    | 462                        |                  |
| 158  | REVLIMID | WARFARIN SODIUM | 0.2892945324 | 296                        |                  |
| 165  | FORTEO   | HYDROCORTISONE  | 0.1823792278 | 1542                       |                  |
| 166  | INSULIN  | LEVITRA         | 0.1823792278 | 1214                       |                  |
| 171  | AGGRENOX | PLAVIX          | 0.1273518372 | 3209                       |                  |

**Table S8** Novel drug-drug interaction predictions for suicide related adverse events.

| Rank | Drug A         | Drug B              | Score         | Minimum Randomization Rank | Known DDI exists |
|------|----------------|---------------------|---------------|----------------------------|------------------|
| 19   | NORCO          | OXYCONTIN           | 15.4242800184 | 719                        |                  |
| 28   | LORCET-HD      | OXYCONTIN           | 12.9194524588 | 142                        |                  |
| 78   | GEODON         | KLONOPIN            | 3.9078199162  | 111                        |                  |
| 111  | CARISOPRODOL   | OXYCODONE HCL       | 1.4658        | 2844                       |                  |
| 123  | OXYCONTIN      | XANAX               | 1.02816987706 | 157                        |                  |
| 134  | CERVIDIL       | TERBUTALINE SULFATE | 0.4052        | 2755                       |                  |
| 136  | DIPROSONE      | PROTOPIC            | 0.4052        | 2125                       |                  |
| 137  | ERYTHROMYCIN   | PREDNISOLONE        | 0.4052        | 1962                       |                  |
| 138  | FLUOXETINE HCL | FOLIC ACID          | 0.4052        | 1813                       |                  |
| 133  | ASTELIN        | LEVONORGESTREL      | 0.4052        | 3290                       |                  |
| 145  | SINGULAIR      | SYNTHROID           | 0.20571855252 | 243                        |                  |

**Table S9.** Features used in the cholesterol logistic regression model.

| <b>Adverse Event Feature</b>  | <b>Association P-Value</b> |
|-------------------------------|----------------------------|
| MYALGIA                       | 7.240E-05                  |
| RHABDOMYOLYSIS                | 9.694E-05                  |
| AMYOTROPHIC LATERAL SCLEROSIS | 6.069E-04                  |

**Table S10.** Features used in the depression logistic regression model.

| <b>Adverse Event Feature</b>      | <b>Association P-Value</b> |
|-----------------------------------|----------------------------|
| MYOCARDIAL INFARCTION             | 2.140E-07                  |
| COMPLETED SUICIDE                 | 7.781E-07                  |
| SUICIDAL IDEATION                 | 3.933E-06                  |
| AGITATION                         | 1.111E-05                  |
| MATERNAL DRUGS AFFECTING FOETUS   | 3.308E-05                  |
| IRRITABILITY                      | 3.736E-05                  |
| CEREBROVASCULAR ACCIDENT          | 5.965E-05                  |
| AGGRESSION                        | 1.125E-04                  |
| OEDEMA PERIPHERAL                 | 1.133E-04                  |
| INTENTIONAL OVERDOSE              | 1.373E-04                  |
| PAIN                              | 1.622E-04                  |
| DYSPNOEA                          | 3.782E-04                  |
| PREMATURE BABY                    | 4.884E-04                  |
| DRUG WITHDRAWAL SYNDROME NEONATAL | 6.648E-04                  |
| NEONATAL DISORDER                 | 6.648E-04                  |
| CRYING                            | 6.695E-04                  |
| SUICIDE ATTEMPT                   | 7.435E-04                  |
| RENAL FAILURE                     | 7.526E-04                  |
| ABDOMINAL PAIN UPPER              | 8.004E-04                  |

**Table S11.** Features used in the diabetes logistic regression model.

| <b>Adverse Event Feature</b> | <b>Association P-Value</b> |
|------------------------------|----------------------------|
| PYREXIA                      | 2.534E-09                  |
| PAIN IN EXTREMITY            | 1.034E-06                  |
| HYPOGLYCAEMIA                | 1.412E-06                  |
| NAUSEA                       | 5.690E-06                  |
| PAIN                         | 8.332E-06                  |
| ANOREXIA                     | 1.220E-05                  |
| PARAESTHESIA                 | 1.456E-05                  |
| ABDOMINAL PAIN               | 1.868E-05                  |
| BLOOD GLUCOSE INCREASED      | 2.125E-05                  |
| DIARRHOEA                    | 2.233E-05                  |
| HEART RATE INCREASED         | 2.534E-05                  |
| DRUG INTERACTION             | 2.698E-05                  |
| DEPRESSION                   | 3.074E-05                  |
| CONDITION AGGRAVATED         | 3.345E-05                  |

**Table S10.** Features used in the depression logistic regression model.

| <b>Adverse Event Feature</b> | <b>Association P-Value</b> |
|------------------------------|----------------------------|
| BLOOD PRESSURE DECREASED     | 5.527E-05                  |

**Table S12.** Features used in the hepatotoxicity logistic regression model.

| <b>Adverse Event Feature</b>              | <b>Association P-Value</b> |
|-------------------------------------------|----------------------------|
| CARDIAC DISORDER                          | 1.113E-04                  |
| HYPOAESTHESIA                             | 1.734E-04                  |
| PAIN IN EXTREMITY                         | 2.088E-04                  |
| MEDICATION ERROR                          | 3.865E-04                  |
| THROMBOTIC THROMBOCYTOPENIC PURPURA       | 9.776E-04                  |
| PAIN                                      | 1.056E-03                  |
| LOSS OF CONSCIOUSNESS                     | 1.521E-03                  |
| ANXIETY                                   | 1.816E-03                  |
| NEUTROPHIL COUNT DECREASED                | 1.953E-03                  |
| CHOLECYSTITIS                             | 3.323E-03                  |
| TRANSMISSION OF DRUG VIA SEMEN            | 3.323E-03                  |
| CONGENITAL CENTRAL NERVOUS SYSTEM ANOMALY | 3.369E-03                  |
| HEPATIC ENZYME INCREASED                  | 3.515E-03                  |
| CONGENITAL ANOMALY                        | 5.758E-03                  |
| MATERNAL DRUGS AFFECTING FOETUS           | 5.758E-03                  |
| MYOCARDIAL INFARCTION                     | 6.966E-03                  |
| DRUG INEFFECTIVE                          | 7.056E-03                  |
| BLOOD PRESSURE INADEQUATELY CONTROLLED    | 8.012E-03                  |
| HAEMORRHAGE                               | 8.132E-03                  |
| TOXIC EPIDERMAL NECROLYSIS                | 8.809E-03                  |
| JAUNDICE                                  | 9.079E-03                  |
| CEREBROVASCULAR ACCIDENT                  | 1.046E-02                  |
| ABORTION INDUCED                          | 1.250E-02                  |
| CORONARY ARTERY DISEASE                   | 1.282E-02                  |
| APLASTIC ANAEMIA                          | 1.303E-02                  |
| AGITATION                                 | 1.361E-02                  |
| HEPATIC ENZYME ABNORMAL                   | 1.368E-02                  |
| ERYTHEMA                                  | 1.373E-02                  |
| ALVEOLITIS ALLERGIC                       | 1.419E-02                  |
| AMYOTROPHIC LATERAL SCLEROSIS             | 1.419E-02                  |
| TRISOMY 21                                | 1.419E-02                  |

**Table S13.** Features used in the hypertension logistic regression model.

| <b>Adverse Event Feature</b>           | <b>Association P-Value</b> |
|----------------------------------------|----------------------------|
| BLOOD PRESSURE INCREASED               | 8.075E-08                  |
| BLOOD PRESSURE INADEQUATELY CONTROLLED | 1.457E-04                  |
| SWOLLEN TONGUE                         | 1.976E-04                  |
| HYPOTENSION                            | 5.960E-04                  |
| ANGIOEDEMA                             | 7.229E-04                  |

**Table S13.** Features used in the hypertension logistic regression model.

| <b>Adverse Event Feature</b>    | <b>Association P-Value</b> |
|---------------------------------|----------------------------|
| THERAPEUTIC RESPONSE UNEXPECTED | 3.001E-03                  |
| HYPERGLYCAEMIA                  | 3.632E-03                  |
| PAIN                            | 4.563E-03                  |
| DRUG INEFFECTIVE                | 6.255E-03                  |
| OEDEMA PERIPHERAL               | 6.906E-03                  |
| DYSPHAGIA                       | 7.383E-03                  |
| WHEEZING                        | 7.383E-03                  |
| HYPERTENSION                    | 9.445E-03                  |
| COUGH                           | 1.051E-02                  |
| TREMOR                          | 1.395E-02                  |
| NAUSEA                          | 1.570E-02                  |
| RESPIRATORY ARREST              | 1.721E-02                  |
| SWELLING FACE                   | 1.957E-02                  |
| POISONING                       | 2.470E-02                  |
| HYPERKALAEMIA                   | 2.769E-02                  |
| DRUG WITHDRAWAL SYNDROME        | 2.772E-02                  |
| BRADYCARDIA                     | 2.860E-02                  |
| CAESAREAN SECTION               | 3.051E-02                  |
| INTENTIONAL OVERDOSE            | 3.051E-02                  |
| HYPOKALAEMIA                    | 3.669E-02                  |
| WEIGHT DECREASED                | 3.860E-02                  |
| ASTHMA                          | 3.900E-02                  |
| OEDEMA                          | 3.900E-02                  |

**Table S14.** Features used in the liver dysfunction logistic regression model.

| <b>Adverse Event Feature</b>        | <b>Association P-Value</b> |
|-------------------------------------|----------------------------|
| MEDICATION ERROR                    | 2.168E-05                  |
| DRUG LEVEL DECREASED                | 4.630E-05                  |
| BRADYCARDIA                         | 2.201E-04                  |
| STEVENS-JOHNSON SYNDROME            | 6.989E-04                  |
| CEREBROVASCULAR ACCIDENT            | 7.106E-04                  |
| DRUG TOXICITY                       | 1.121E-03                  |
| DRUG EXPOSURE DURING PREGNANCY      | 1.739E-03                  |
| TOXIC EPIDERMAL NECROLYSIS          | 2.836E-03                  |
| ANTICONVULSANT DRUG LEVEL DECREASED | 3.564E-03                  |
| MYOCARDIAL INFARCTION               | 4.274E-03                  |
| ANXIETY                             | 4.615E-03                  |
| DEPRESSION                          | 5.210E-03                  |
| COMPLETED SUICIDE                   | 8.609E-03                  |
| GASTROINTESTINAL HAEMORRHAGE        | 8.609E-03                  |
| OVERDOSE                            | 9.861E-03                  |
| INCORRECT DOSE ADMINISTERED         | 1.198E-02                  |
| INSOMNIA                            | 1.227E-02                  |
| PHARMACEUTICAL PRODUCT COMPLAINT    | 1.324E-02                  |

**Table S13.** Features used in the hypertension logistic regression model.

| <b>Adverse Event Feature</b> | <b>Association P-Value</b> |
|------------------------------|----------------------------|
| OEDEMA                       | 1.443E-02                  |
| AMMONIA INCREASED            | 1.483E-02                  |
| HYPERTENSION                 | 2.065E-02                  |
| HYPOTENSION                  | 2.159E-02                  |
| CARDIAC FAILURE CONGESTIVE   | 2.475E-02                  |
| DYSPHAGIA                    | 2.475E-02                  |
| INTESTINAL PERFORATION       | 3.512E-02                  |
| NEONATAL DISORDER            | 3.512E-02                  |
| HYPERSENSITIVITY             | 3.612E-02                  |

**Table S15.** Features used in the renal impairment logistic regression model.

| <b>Adverse Event Feature</b>     | <b>Association P-Value</b> |
|----------------------------------|----------------------------|
| ANGIONEUROTIC OEDEMA             | 5.252E-06                  |
| HYPERSENSITIVITY                 | 4.741E-04                  |
| STEVENS-JOHNSON SYNDROME         | 6.041E-04                  |
| MYOCARDIAL INFARCTION            | 9.796E-04                  |
| ANGIOEDEMA                       | 2.497E-03                  |
| COUGH                            | 2.497E-03                  |
| PHARMACEUTICAL PRODUCT COMPLAINT | 9.162E-03                  |
| CEREBROVASCULAR ACCIDENT         | 9.507E-03                  |
| TOXIC EPIDERMAL NECROLYSIS       | 9.515E-03                  |
| VESTIBULAR DISORDER              | 9.515E-03                  |
| GASTROINTESTINAL HAEMORRHAGE     | 1.297E-02                  |
| HYPERKALAEMIA                    | 2.068E-02                  |
| DRUG EXPOSURE DURING PREGNANCY   | 2.434E-02                  |
| SWOLLEN TONGUE                   | 3.216E-02                  |
| VISION BLURRED                   | 3.216E-02                  |
| INTESTINAL PERFORATION           | 4.046E-02                  |
| THERAPEUTIC RESPONSE UNEXPECTED  | 4.063E-02                  |

**Table S16.** Features used in the suicide logistic regression model.

| <b>Adverse Event Feature</b>   | <b>Association P-Value</b> |
|--------------------------------|----------------------------|
| DRUG EXPOSURE DURING PREGNANCY | 1.532E-06                  |
| SUICIDAL IDEATION              | 1.187E-02                  |
| DRUG WITHDRAWAL SYNDROME       | 4.824E-02                  |

**Table S17.** Severe Adverse Event Classes

| <b>AERS Drug Term</b> | <b>Event Class</b> |
|-----------------------|--------------------|
| ALTOCOR               | CHOL               |
| ALTOPREV              | CHOL               |

**Table S17. Severe Adverse Event Classes**

| <b>AERS Drug Term</b>       | <b>Event Class</b> |
|-----------------------------|--------------------|
| ANTARA                      | CHOL               |
| ANTARA (MICRONIZED)         | CHOL               |
| ATORVASTATIN CALCIUM        | CHOL               |
| CLOPIDOGREL                 | CHOL               |
| CLOPIDOGREL BISULFATE       | CHOL               |
| COLESTIPOL HYDROCHLORIDE    | CHOL               |
| CRESTOR                     | CHOL               |
| FENOFIBRATE                 | CHOL               |
| FENOGLIDE                   | CHOL               |
| FLUVASTATIN SODIUM          | CHOL               |
| GEMFIBROZIL                 | CHOL               |
| LESCOL                      | CHOL               |
| LESCOL XL                   | CHOL               |
| LIPIDIL                     | CHOL               |
| LIPITOR                     | CHOL               |
| LIPOFEN                     | CHOL               |
| LOPID                       | CHOL               |
| LOVASTATIN                  | CHOL               |
| MEVACOR                     | CHOL               |
| NIACIN                      | CHOL               |
| NIACOR                      | CHOL               |
| NIASPAN                     | CHOL               |
| NICOTINIC ACID              | CHOL               |
| PLAVIX                      | CHOL               |
| PRAVACHOL                   | CHOL               |
| PRAVASTATIN                 | CHOL               |
| PRAVASTATIN SODIUM          | CHOL               |
| ROSUVASTATIN CALCIUM        | CHOL               |
| SIMVASTATIN                 | CHOL               |
| TICLID                      | CHOL               |
| TICLOPIDINE HYDROCHLORIDE   | CHOL               |
| TRICOR                      | CHOL               |
| TRICOR (MICRONIZED)         | CHOL               |
| TRIGLIDE                    | CHOL               |
| WELCHOL                     | CHOL               |
| ZOCOR                       | CHOL               |
| AMITRIPTYLINE HYDROCHLORIDE | DEPR               |
| ELAVIL                      | DEPR               |
| ANAFRANIL                   | DEPR               |
| CLOMIPRAMINE HYDROCHLORIDE  | DEPR               |
| ATOMOXETINE HCL             | DEPR               |
| STRATTERA                   | DEPR               |
| BUPROPION HYDROCHLORIDE     | DEPR               |
| WELLBUTRIN                  | DEPR               |

**Table S17. Severe Adverse Event Classes**

| <b>AERS Drug Term</b>     | <b>Event Class</b> |
|---------------------------|--------------------|
| WELLBUTRIN SR             | DEPR               |
| WELLBUTRIN XL             | DEPR               |
| ZYBAN                     | DEPR               |
| BUSPAR                    | DEPR               |
| BUSPIRONE                 | DEPR               |
| BUSPIRONE HYDROCHLORIDE   | DEPR               |
| CELEXA                    | DEPR               |
| CITALOPRAM                | DEPR               |
| CITALOPRAM HYDROBROMIDE   | DEPR               |
| ESCITALOPRAM              | DEPR               |
| ESCITALOPRAM OXALATE      | DEPR               |
| LEXAPRO                   | DEPR               |
| CYMBALTA                  | DEPR               |
| DULOXETINE HYDROCHLORIDE  | DEPR               |
| DESIPRAMINE HYDROCHLORIDE | DEPR               |
| NORPRAMIN                 | DEPR               |
| DESYREL                   | DEPR               |
| TRAZODONE HYDROCHLORIDE   | DEPR               |
| DOXEPIN HCL               | DEPR               |
| DOXEPIN HYDROCHLORIDE     | DEPR               |
| SINEQUAN                  | DEPR               |
| ZONALON                   | DEPR               |
| EFFEXOR                   | DEPR               |
| EFFEXOR XR                | DEPR               |
| VENLAFAXINE HYDROCHLORIDE | DEPR               |
| EMSAM                     | DEPR               |
| SELEGILINE HYDROCHLORIDE  | DEPR               |
| ZELAPAR                   | DEPR               |
| FLUOXETINE                | DEPR               |
| FLUOXETINE HYDROCHLORIDE  | DEPR               |
| PROZAC                    | DEPR               |
| SARAFEM                   | DEPR               |
| FLUVOXAMINE MALEATE       | DEPR               |
| LUVOX                     | DEPR               |
| LUVOX CR                  | DEPR               |
| IMIPRAMINE                | DEPR               |
| IMIPRAMINE HYDROCHLORIDE  | DEPR               |
| IMIPRAMINE PAMOATE        | DEPR               |
| TOFRANIL-PM               | DEPR               |
| MARPLAN                   | DEPR               |
| MIRTAZAPINE               | DEPR               |
| REMERON                   | DEPR               |
| REMERON SOLTAB            | DEPR               |
| NARDIL                    | DEPR               |

**Table S17. Severe Adverse Event Classes**

| <b>AERS Drug Term</b>       | <b>Event Class</b> |
|-----------------------------|--------------------|
| NEFAZODONE HYDROCHLORIDE    | DEPR               |
| SERZONE                     | DEPR               |
| NORTRIPTYLINE HCL           | DEPR               |
| NORTRIPTYLINE HYDROCHLORIDE | DEPR               |
| PAMELOR                     | DEPR               |
| PARNATE                     | DEPR               |
| TRANLYCYPROMINE SULFATE     | DEPR               |
| PAROXETINE                  | DEPR               |
| PAROXETINE HCL              | DEPR               |
| PAROXETINE HYDROCHLORIDE    | DEPR               |
| PAROXETINE MESYLATE         | DEPR               |
| PAXIL                       | DEPR               |
| PAXIL CR                    | DEPR               |
| PEXEVA                      | DEPR               |
| PRISTIQ                     | DEPR               |
| SERTRALINE                  | DEPR               |
| SERTRALINE HYDROCHLORIDE    | DEPR               |
| ZOLOFT                      | DEPR               |
| SURMONTIL                   | DEPR               |
| TRIMIPRAMINE MALEATE        | DEPR               |
| ACARBOSE                    | DIAB               |
| ACTOPLUS MET                | DIAB               |
| ACTOS                       | DIAB               |
| AMARYL                      | DIAB               |
| APIDRA                      | DIAB               |
| AVANDAMET                   | DIAB               |
| AVANDIA                     | DIAB               |
| BYETTA                      | DIAB               |
| DIABINESE                   | DIAB               |
| EXUBERA                     | DIAB               |
| GLIMEPIRIDE                 | DIAB               |
| GLIPIZIDE                   | DIAB               |
| GLUCOBAY                    | DIAB               |
| GLUCOPHAGE                  | DIAB               |
| GLUCOPHAGE XR               | DIAB               |
| GLUCOTROL XL                | DIAB               |
| GLUCOVANCE                  | DIAB               |
| GLYBURIDE                   | DIAB               |
| GLYBURIDE AND METFORMIN HCL | DIAB               |
| HUMALOG                     | DIAB               |
| HUMALOG MIX 50/50           | DIAB               |
| HUMALOG MIX 75/25           | DIAB               |
| HUMALOG PEN                 | DIAB               |
| HUMULIN 70/30               | DIAB               |

**Table S17. Severe Adverse Event Classes**

| <b>AERS Drug Term</b>   | <b>Event Class</b> |
|-------------------------|--------------------|
| HUMULIN L               | DIAB               |
| HUMULIN N               | DIAB               |
| HUMULIN R               | DIAB               |
| HUMULIN U               | DIAB               |
| ILETIN                  | DIAB               |
| INSULIN                 | DIAB               |
| JANUMET                 | DIAB               |
| JANUVIA                 | DIAB               |
| LANTUS                  | DIAB               |
| LEVEMIR                 | DIAB               |
| LISINOPRIL              | DIAB               |
| METAGLIP                | DIAB               |
| METFORMIN               | DIAB               |
| METFORMIN HCL           | DIAB               |
| METFORMIN HYDROCHLORIDE | DIAB               |
| MIXTARD HUMAN 70/30     | DIAB               |
| NOVOLIN 70/30           | DIAB               |
| NOVOLIN N               | DIAB               |
| NOVOLIN R               | DIAB               |
| NOVOLOG                 | DIAB               |
| NOVOLOG MIX 70/30       | DIAB               |
| NPH INSULIN             | DIAB               |
| PIOGLITAZONE HCL        | DIAB               |
| PRANDIN                 | DIAB               |
| ROSIGLITAZONE           | DIAB               |
| ROSIGLITAZONE MALEATE   | DIAB               |
| STARLIX                 | DIAB               |
| SYMLIN                  | DIAB               |
| ACETAMINOPHEN           | HEPTOX             |
| TYLENOL (CAPLET)        | HEPTOX             |
| TYLENOL (GELTAB)        | HEPTOX             |
| ALLOPURINOL             | HEPTOX             |
| AMOXICILLIN             | HEPTOX             |
| AMOXIL                  | HEPTOX             |
| AURANOFIN               | HEPTOX             |
| RIDAURA                 | HEPTOX             |
| AZATHIOPRINE            | HEPTOX             |
| IMURAN                  | HEPTOX             |
| AZACTAM                 | HEPTOX             |
| AZTREONAM               | HEPTOX             |
| CAPOTEN                 | HEPTOX             |
| CAPTOPRIL               | HEPTOX             |
| HYDROCHLOROTHIAZIDE     | HEPTOX             |
| LEUKERAN                | HEPTOX             |

**Table S17. Severe Adverse Event Classes**

| <b>AERS Drug Term</b> | <b>Event Class</b> |
|-----------------------|--------------------|
| CHLOROTHIAZIDE        | HEPTOX             |
| DIURIL                | HEPTOX             |
| CHLORTHALIDONE        | HEPTOX             |
| CHLORZOXAZONE         | HEPTOX             |
| CYCLOSPORINE          | HEPTOX             |
| NEORAL                | HEPTOX             |
| RESTASIS              | HEPTOX             |
| SANDIMMUNE            | HEPTOX             |
| DACARBAZINE           | HEPTOX             |
| COSMEGEN              | HEPTOX             |
| DACTINOMYCIN          | HEPTOX             |
| DANAZOL               | HEPTOX             |
| EDECRIN               | HEPTOX             |
| ETOPOSIDE             | HEPTOX             |
| VEPESID               | HEPTOX             |
| EULEXIN               | HEPTOX             |
| FLUTAMIDE             | HEPTOX             |
| ITRACONAZOLE          | HEPTOX             |
| SPORANOX              | HEPTOX             |
| KETOCONAZOLE          | HEPTOX             |
| XOLEGEL               | HEPTOX             |
| LISINOPRIL            | HEPTOX             |
| PRINIVIL              | HEPTOX             |
| PRINZIDE              | HEPTOX             |
| ZESTRIL               | HEPTOX             |
| ALTOCOR               | HEPTOX             |
| ALTOPREV              | HEPTOX             |
| LOVASTATIN            | HEPTOX             |
| MEVACOR               | HEPTOX             |
| MERCAPTOPURINE        | HEPTOX             |
| PURINETHOL            | HEPTOX             |
| CANASA                | HEPTOX             |
| LIALDA                | HEPTOX             |
| MESALAMINE            | HEPTOX             |
| PENTASA               | HEPTOX             |
| ROWASA                | HEPTOX             |
| METHIMAZOLE           | HEPTOX             |
| TAPAZOLE              | HEPTOX             |
| METOLAZONE            | HEPTOX             |
| MYKROX                | HEPTOX             |
| ZAROXOLYN             | HEPTOX             |
| NIACIN                | HEPTOX             |
| NIACOR                | HEPTOX             |
| NIASPAN               | HEPTOX             |

**Table S17. Severe Adverse Event Classes**

| <b>AERS Drug Term</b>  | <b>Event Class</b> |
|------------------------|--------------------|
| NICOTINIC ACID         | HEPTOX             |
| ESOMEPRAZOLE MAGNESIUM | HEPTOX             |
| NEXIUM                 | HEPTOX             |
| NEXIUM IV              | HEPTOX             |
| OMEPRAZOLE             | HEPTOX             |
| OMEPRAZOLE MAGNESIUM   | HEPTOX             |
| PRILOSEC               | HEPTOX             |
| PRILOSEC OTC           | HEPTOX             |
| COPEGUS                | HEPTOX             |
| REBETOL                | HEPTOX             |
| RIBAVIRIN              | HEPTOX             |
| VIRAZOLE               | HEPTOX             |
| RIFADIN                | HEPTOX             |
| RIFAMPIN               | HEPTOX             |
| RIMACTANE              | HEPTOX             |
| SIMVASTATIN            | HEPTOX             |
| ZOCOR                  | HEPTOX             |
| AZULFIDINE             | HEPTOX             |
| AZULFIDINE EN-TABS     | HEPTOX             |
| SULFASALAZINE          | HEPTOX             |
| BICALUTAMIDE           | HEPTOX             |
| CASODEX                | HEPTOX             |
| DOCETAXEL              | HEPTOX             |
| TAXOTERE               | HEPTOX             |
| CARVEDILOL             | HEPTOX             |
| COREG                  | HEPTOX             |
| COREG CR               | HEPTOX             |
| ANTARA                 | HEPTOX             |
| ANTARA (MICRONIZED)    | HEPTOX             |
| FENOFIBRATE            | HEPTOX             |
| FENOGLIDE              | HEPTOX             |
| LIPIDIL                | HEPTOX             |
| LIPOFEN                | HEPTOX             |
| TRICOR                 | HEPTOX             |
| TRICOR (MICRONIZED)    | HEPTOX             |
| TRIGLIDE               | HEPTOX             |
| ARAVA                  | HEPTOX             |
| LEFLUNOMIDE            | HEPTOX             |
| RAPAMUNE               | HEPTOX             |
| NORVIR                 | HEPTOX             |
| RITONAVIR              | HEPTOX             |
| BOSENTAN               | HEPTOX             |
| TRACLEER               | HEPTOX             |
| KETEK                  | HEPTOX             |

**Table S17. Severe Adverse Event Classes**

| <b>AERS Drug Term</b>                     | <b>Event Class</b> |
|-------------------------------------------|--------------------|
| EZETIMIBE                                 | HEPTOX             |
| ZETIA                                     | HEPTOX             |
| CLOLAR                                    | HEPTOX             |
| ISOSORBIDE DINITRATE                      | HEPTOX             |
| SODIUM BICARBONATE                        | HEPTOX             |
| EFAVIRENZ                                 | HEPTOX             |
| SUSTIVA                                   | HEPTOX             |
| TENOFOVIR DISOPROXIL FUMARATE             | HEPTOX             |
| VIREAD                                    | HEPTOX             |
| METOPROLOL SUCCINATE                      | HTN                |
| ATENOLOL                                  | HTN                |
| AMLODIPINE BESYLATE                       | HTN                |
| DOXAZOSIN MESYLATE                        | HTN                |
| NIFEDIPINE                                | HTN                |
| SPIRONOLACTONE                            | HTN                |
| ENALAPRIL MALEATE                         | HTN                |
| CLONIDINE                                 | HTN                |
| LABETALOL HCL                             | HTN                |
| FUROSEMIDE                                | HTN                |
| BUMETANIDE                                | HTN                |
| LISINAPRIL                                | HTN                |
| TERAZOSIN HCL                             | HTN                |
| CAPTAPRIL                                 | HTN                |
| METOPROLOL TARTRATE                       | HTN                |
| TRIAMTERENE AND HYDROCHLOROTHIAZIDE       | HTN                |
| FELODIPINE                                | HTN                |
| CARVEDILOL                                | HTN                |
| VERAPAMIL                                 | HTN                |
| DILTIAZEM                                 | HTN                |
| HYDROCHLOROTHIAZIDE                       | HTN                |
| FOSINAPRIL SODIUM                         | HTN                |
| CLONIDINE HCL                             | HTN                |
| DILTIAZEM HCL                             | HTN                |
| ENALAPRIL MALEATE AND HYDROCHLOROTHIAZIDE | HTN                |
| PROPRANOLOL                               | HTN                |
| NICARDIPINE HCL                           | HTN                |
| CAPTAPRIL AND HYDROCHLOROTHIAZIDE         | HTN                |
| RAMIPRIL                                  | HTN                |
| NICARDIPINE HYDROCHLORIDE                 | HTN                |
| METHYLDOPA                                | HTN                |
| INDAPAMIDE                                | HTN                |
| DILTIAZEM HYDROCHLORIDE                   | HTN                |
| AMILORIDE HCL AND HYDROCHLOROTHIAZIDE     | HTN                |
| NADOLOL                                   | HTN                |

**Table S17. Severe Adverse Event Classes**

| <b>AERS Drug Term</b>                       | <b>Event Class</b> |
|---------------------------------------------|--------------------|
| LISINAPRIL AND HYDROCHLOROTHIAZIDE          | HTN                |
| TORSEMIDE                                   | HTN                |
| QUINAPRIL HCL                               | HTN                |
| AMLODIPINE                                  | HTN                |
| DOXAZOSIN MESLYLATE                         | HTN                |
| TIMOLOL MALEATE                             | HTN                |
| AMILORIDE HCL                               | HTN                |
| METOLAZONE                                  | HTN                |
| IRBESARTAN                                  | HTN                |
| PRAZOSIN HCL                                | HTN                |
| RESERPINE                                   | HTN                |
| VERAPAMIL HCL                               | HTN                |
| ENALAPRILAT                                 | HTN                |
| TERAZOSIN HYDROCHLORIDE                     | HTN                |
| CHLORTHALIDONE                              | HTN                |
| PROPRANOLOL HCL                             | HTN                |
| LABETALOL HYDROCHLORIDE                     | HTN                |
| LERCANIDIPINE                               | HTN                |
| HYDROCHLOROTHIAZIDE 25MG TAB                | HTN                |
| VERAPAMIL HYDROCHLORIDE                     | HTN                |
| GUANFACINE HCL                              | HTN                |
| BENAZEPRIL HCL                              | HTN                |
| BISOPROLOL FUMARATE AND HYDROCHLOROTHIAZIDE | HTN                |
| AMLODIPINE MALEATE                          | HTN                |
| CHLOROTHIAZIDE                              | HTN                |
| ATENOLOL AND CHLORTHALIDONE                 | HTN                |
| HYDROCHLOROTHIAZIDE TAB                     | HTN                |
| EPLERENONE                                  | HTN                |
| NIMODIPINE                                  | HTN                |
| AMILORIDE HCL AND HYDROCHLOROTHIAZIDE       | HTN                |
| PRAZOSIN GITS                               | HTN                |
| TRIAMETERENE AND HYDROCHLOROTHIAZIDE        | HTN                |
| INDORAMIN                                   | HTN                |
| PROPRANOLOL HYDROCHLORIDE                   | HTN                |
| GUANABENZ ACETATE                           | HTN                |
| PHENTOLAMINE MESYLATE                       | HTN                |
| TRIAMETERENE W/ HYDROCHLOROTHIAZIDE         | HTN                |
| LOSARTAN POTASSIUM                          | HTN                |
| TRAVOPROST AND TIMOLOL                      | HTN                |
| PINDOLOL                                    | HTN                |
| SPIRONOLACTONE/HYDROCHLOROTHIAZIDE          | HTN                |
| QUINAPRIL HCL HYDROCHLOROTHIAZIDE           | HTN                |
| SPIRONOLACTONE W/ HYDROCHLOROTHIAZIDE       | HTN                |
| LOSARTAN POTASSIUM AND HYDROCHLOROTHIAZIDE  | HTN                |

**Table S17. Severe Adverse Event Classes**

| <b>AERS Drug Term</b>                            | <b>Event Class</b> |
|--------------------------------------------------|--------------------|
| RESERPINE AND HYDROCHLOROTHIAZIDE                | HTN                |
| HYDROCHLOROTHIAZIDE AND LISINOPRIL               | HTN                |
| HYDROCHLOROTHIAZIDE 50MG TAB                     | HTN                |
| ISRADIPINE                                       | HTN                |
| SPIRONOLACTONE AND HYDROCHLOROTHIAZIDE           | HTN                |
| BENAZEPRIL HCL AND HYDROCHLOROTHIAZIDE           | HTN                |
| METHYLDOPATE HCL                                 | HTN                |
| LABETALOL                                        | HTN                |
| METOPROLOL SUCCINATE EXTENDED RELEASE            | HTN                |
| PROPRANOLOL HCL INTENSOL                         | HTN                |
| TERAZOSIN                                        | HTN                |
| AMLODIPINE BESYLATE AND BENAZEPRIL HCL           | HTN                |
| TRANDOLAPRIL                                     | HTN                |
| IRBESARTAN - HYDROCHLOROTHIAZIDE                 | HTN                |
| VALSARTAN                                        | HTN                |
| QUINAPRIL                                        | HTN                |
| QUINAPRIL HYDROCHLORIDE AND HYDROCHLOROTHIAZIDE  | HTN                |
| VERAPAMIL EXTENDED-RELEASE                       | HTN                |
| SPIRONOLACTONE 25MG TAB                          | HTN                |
| BENAZEPRIL HYDROCHLORIDE                         | HTN                |
| BENAZEPRIL HCL + HYDROCHLOROTHIAZIDE             | HTN                |
| METOPROLOL TARTRATE AND HYDROCHLOROTHIAZIDE      | HTN                |
| GUANETHIDINE SULFATE                             | HTN                |
| BENAZEPRIL HYDROCHLOROTHIAZIDE                   | HTN                |
| FOSINOPRIL SODIUM AND HYDROCHLOROTHIAZIDE        | HTN                |
| IRBESARTAN AND HYDROCHLOROTHIAZIDE               | HTN                |
| AMILORIDE HYDROCHLORIDE                          | HTN                |
| QUINAPRIL HCL + HYDROCHLOROTHIAZIDE              | HTN                |
| IRBESARTAN + HYDROCHLOROTHIAZIDE                 | HTN                |
| FUROSEMIDE INTENSOL                              | HTN                |
| PERINDOPRIL ERUMINE                              | HTN                |
| PERINDOPRIL ERBUMINE                             | HTN                |
| BENAZEPRIL HYDROCHLORIDE AND HYDROCHLOROTHIAZIDE | HTN                |
| LOSARTAN POSTASSIUM                              | HTN                |
| CAPTOPRIL HYDROCHLOROTHIAZIDE                    | HTN                |
| VALSARTAN AND HYDROCHLOROTHIAZIDE                | HTN                |
| OLMESARTAN MEDOXOMIL                             | HTN                |
| NIFEDIPINE HCL                                   | HTN                |
| TOLAZOLINE HCL                                   | HTN                |
| DORZOLAMIDE HCL TIMOLOL MALEATE                  | HTN                |
| OLMESARTAN MEDOXOMIL AND HYDROCHLOROTHIAZIDE     | HTN                |
| APRACLONIDINE                                    | HTN                |
| CANDESARTAN CILEXETIL                            | HTN                |

**Table S17. Severe Adverse Event Classes**

| <b>AERS Drug Term</b>                              | <b>Event Class</b> |
|----------------------------------------------------|--------------------|
| TELMISARTAN                                        | HTN                |
| GUANFACINE HYDROCHLORIDE                           | HTN                |
| CLONIDINE HYDROCHLORIDE                            | HTN                |
| FELODIPINE EXTENDED RELEASE                        | HTN                |
| MOEXIPRIL HYDROCHLORIDE AND HYDROCHLOROTHIAZIDE    | HTN                |
| BRIMONIDINE TARTRATE AND TIMOLOL                   | HTN                |
| DORZOLAMIDE HCL AND TIMOLOL MALEATE                | HTN                |
| PROPRANOLOL HYDROCHLORIDE + HYDROCHLOROTHIAZIDE    | HTN                |
| AMLODIPINE MALEATE/ BENAZEPRIL HYDROCHLORIDE       | HTN                |
| AMLODIPINE BESYLATE AND BENAZEPRIL HYDROCHLORIDE   | HTN                |
| AMLODIPINE BESYLATE AND ATORVASTATIN CALIUM        | HTN                |
| METHYLDOPA/HYDROCHLOROTHIAZIDE                     | HTN                |
| QUINAPRIL HCL AND HYDROCHLOROTHIAZIDE              | HTN                |
| PRAZOSIN HYDROCHLORIDE                             | HTN                |
| QUINAPRIL HYDROCHLORIDE                            | HTN                |
| DILTIAZEM XR                                       | HTN                |
| TRANDOLAPRIL AND VERAPAMIL HYDROCHLORIDE EXT. REL. | HTN                |
| DORZOLAMIDE HYDROCHLORIDE AND TIMOLOL MALEATE      | HTN                |
| PROPRANOLOL HYDROCHLORIDE INTENSOL                 | HTN                |
| ACEBUTOLOL                                         | LIVDYS             |
| ACEBUTOLOL HYDROCHLORIDE                           | LIVDYS             |
| SECTRAL                                            | LIVDYS             |
| ACETAMINOPHEN                                      | LIVDYS             |
| TYLENOL (CAPLET)                                   | LIVDYS             |
| TYLENOL (GELTAB)                                   | LIVDYS             |
| ACTOS                                              | LIVDYS             |
| PIOGLITAZONE                                       | LIVDYS             |
| PIOGLITAZONE HCL                                   | LIVDYS             |
| ALLOPURINOL                                        | LIVDYS             |
| ATENOLOL                                           | LIVDYS             |
| TENORMIN                                           | LIVDYS             |
| AVANDIA                                            | LIVDYS             |
| ROSIGLITAZONE                                      | LIVDYS             |
| ROSIGLITAZONE MALEATE                              | LIVDYS             |
| CARBAMAZEPINE                                      | LIVDYS             |
| CARBATROL                                          | LIVDYS             |
| EQUETRO                                            | LIVDYS             |
| TEGRETOL                                           | LIVDYS             |
| TEGRETOL-XR                                        | LIVDYS             |
| ADVIL                                              | LIVDYS             |
| ADVIL LIQUI-GELS                                   | LIVDYS             |
| CHILDREN'S ADVIL                                   | LIVDYS             |
| CHILDREN'S IBUPROFEN                               | LIVDYS             |
| CHILDREN'S MOTRIN                                  | LIVDYS             |

**Table S17. Severe Adverse Event Classes**

| <b>AERS Drug Term</b>     | <b>Event Class</b> |
|---------------------------|--------------------|
| IBUPROFEN                 | LIVDYS             |
| JUNIOR STRENGTH ADVIL     | LIVDYS             |
| JUNIOR STRENGTH MOTRIN    | LIVDYS             |
| MOTRIN                    | LIVDYS             |
| MOTRIN IB                 | LIVDYS             |
| NEOPROFEN                 | LIVDYS             |
| NUPRIN                    | LIVDYS             |
| CIMETIDINE                | LIVDYS             |
| TAGAMET HB                | LIVDYS             |
| TAGAMET HB 200            | LIVDYS             |
| DANTRIUM                  | LIVDYS             |
| DANTROLENE SODIUM         | LIVDYS             |
| CATAFLAM                  | LIVDYS             |
| DICLOFENAC POTASSIUM      | LIVDYS             |
| DICLOFENAC SODIUM         | LIVDYS             |
| FLECTOR                   | LIVDYS             |
| SOLARAZE                  | LIVDYS             |
| VOLTAREN                  | LIVDYS             |
| VOLTAREN-XR               | LIVDYS             |
| CARDIZEM                  | LIVDYS             |
| CARDIZEM LA               | LIVDYS             |
| CARTIA XT                 | LIVDYS             |
| DILTIAZEM                 | LIVDYS             |
| DILTIAZEM HYDROCHLORIDE   | LIVDYS             |
| TIAZAC                    | LIVDYS             |
| ENFLURANE                 | LIVDYS             |
| ETHRANE                   | LIVDYS             |
| ETHAMBUTOL HYDROCHLORIDE  | LIVDYS             |
| MYAMBUTOL                 | LIVDYS             |
| EXTENDED PHENYTOIN SODIUM | LIVDYS             |
| PHENYTEK                  | LIVDYS             |
| PHENYTOIN                 | LIVDYS             |
| PHENYTOIN SODIUM          | LIVDYS             |
| CEREBYX                   | LIVDYS             |
| FOSPHENYTOIN              | LIVDYS             |
| FOSPHENYTOIN SODIUM       | LIVDYS             |
| HALOTHANE                 | LIVDYS             |
| INDOCIN                   | LIVDYS             |
| INDOCIN I.V.              | LIVDYS             |
| INDOMETHACIN              | LIVDYS             |
| INDOMETHACIN SODIUM       | LIVDYS             |
| ISONIAZID                 | LIVDYS             |
| KETOCONAZOLE              | LIVDYS             |
| XOLEGEL                   | LIVDYS             |

**Table S17. Severe Adverse Event Classes**

| <b>AERS Drug Term</b>    | <b>Event Class</b> |
|--------------------------|--------------------|
| LABETALOL                | LIVDYS             |
| LABETALOL HYDROCHLORIDE  | LIVDYS             |
| TRANDATE                 | LIVDYS             |
| MAPROTILINE              | LIVDYS             |
| METOPROLOL SUCCINATE     | LIVDYS             |
| METOPROLOL TARTRATE      | LIVDYS             |
| TOPROL-XL                | LIVDYS             |
| ALEVE                    | LIVDYS             |
| EC-NAPROSYN              | LIVDYS             |
| NAPRELAN                 | LIVDYS             |
| NAPROSYN                 | LIVDYS             |
| NAPROXEN                 | LIVDYS             |
| NAPROXEN SODIUM          | LIVDYS             |
| FELDENE                  | LIVDYS             |
| PIROXICAM                | LIVDYS             |
| PROBENECID               | LIVDYS             |
| PYRAZINAMIDE             | LIVDYS             |
| QUALAQUIN                | LIVDYS             |
| QUINIDEX                 | LIVDYS             |
| QUINIDINE SULFATE        | LIVDYS             |
| QUININE SULFATE          | LIVDYS             |
| RANITIDINE               | LIVDYS             |
| RANITIDINE HYDROCHLORIDE | LIVDYS             |
| ZANTAC                   | LIVDYS             |
| ZANTAC 150               | LIVDYS             |
| REZULIN                  | LIVDYS             |
| CLINORIL                 | LIVDYS             |
| SULINDAC                 | LIVDYS             |
| DEPACON                  | LIVDYS             |
| DEPAKOTE                 | LIVDYS             |
| DEPAKOTE ER              | LIVDYS             |
| DIVALPROEX SODIUM        | LIVDYS             |
| VALPROATE SODIUM         | LIVDYS             |
| VALPROIC ACID            | LIVDYS             |
| COVERA-HS                | LIVDYS             |
| ISOPTIN SR               | LIVDYS             |
| VERAPAMIL                | LIVDYS             |
| VERAPAMIL HYDROCHLORIDE  | LIVDYS             |
| VERELAN PM               | LIVDYS             |
| ACCUPRIL                 | RENIMP             |
| QUINAPRIL                | RENIMP             |
| QUINAPRIL HYDROCHLORIDE  | RENIMP             |
| ACEON                    | RENIMP             |
| PERINDOPRIL ERBUMINE     | RENIMP             |

**Table S17. Severe Adverse Event Classes**

| <b>AERS Drug Term</b>                          | <b>Event Class</b> |
|------------------------------------------------|--------------------|
| ALTACE                                         | RENIMP             |
| RAMIPRIL                                       | RENIMP             |
| AMIKACIN                                       | RENIMP             |
| ASPIRIN                                        | RENIMP             |
| BAYER EXTRA STRENGTH ASPIRIN FOR MIGRAINE PAIN | RENIMP             |
| BENZAEPRIIL HCL                                | RENIMP             |
| BENZAEPRIIL HYDROCHLORIDE                      | RENIMP             |
| LOTENSIN                                       | RENIMP             |
| CAPOTEN                                        | RENIMP             |
| CAPTOPRIL                                      | RENIMP             |
| CELEBREX                                       | RENIMP             |
| CELECOXIB                                      | RENIMP             |
| ADVIL                                          | RENIMP             |
| ADVIL LIQUI-GELS                               | RENIMP             |
| CHILDREN'S ADVIL                               | RENIMP             |
| CHILDREN'S IBUPROFEN                           | RENIMP             |
| CHILDREN'S MOTRIN                              | RENIMP             |
| IBUPROFEN                                      | RENIMP             |
| JUNIOR STRENGTH ADVIL                          | RENIMP             |
| JUNIOR STRENGTH MOTRIN                         | RENIMP             |
| MOTRIN                                         | RENIMP             |
| MOTRIN IB                                      | RENIMP             |
| NEOPROFEN                                      | RENIMP             |
| NUPRIN                                         | RENIMP             |
| CATAFLAM                                       | RENIMP             |
| DICLOFENAC POTASSIUM                           | RENIMP             |
| DICLOFENAC SODIUM                              | RENIMP             |
| FLECTOR                                        | RENIMP             |
| SOLARAZE                                       | RENIMP             |
| VOLTAREN                                       | RENIMP             |
| VOLTAREN-XR                                    | RENIMP             |
| DIFLUNISAL                                     | RENIMP             |
| DOLOBID                                        | RENIMP             |
| ENALAPRIL MALEATE                              | RENIMP             |
| ENALAPRILAT                                    | RENIMP             |
| VASOTEC                                        | RENIMP             |
| ETODOLAC                                       | RENIMP             |
| LODINE                                         | RENIMP             |
| LODINE XL                                      | RENIMP             |
| FENOPROFEN CALCIUM                             | RENIMP             |
| NALFON                                         | RENIMP             |
| ANSAID                                         | RENIMP             |
| FLURBIPROFEN                                   | RENIMP             |
| FLURBIPROFEN SODIUM                            | RENIMP             |

**Table S17. Severe Adverse Event Classes**

| <b>AERS Drug Term</b>    | <b>Event Class</b> |
|--------------------------|--------------------|
| OCUFEN                   | RENIMP             |
| FOSINOPRIL SODIUM        | RENIMP             |
| MONOPRIL                 | RENIMP             |
| GENTAMICIN               | RENIMP             |
| INDOCIN                  | RENIMP             |
| INDOCIN I.V.             | RENIMP             |
| INDOMETHACIN             | RENIMP             |
| INDOMETHACIN SODIUM      | RENIMP             |
| KANAMYCIN                | RENIMP             |
| KETOPROFEN               | RENIMP             |
| ORUDIS                   | RENIMP             |
| ORUDIS KT                | RENIMP             |
| ORUVAIL                  | RENIMP             |
| ACULAR                   | RENIMP             |
| ACULAR LS                | RENIMP             |
| ACULAR PRESERVATIVE FREE | RENIMP             |
| KETOROLAC                | RENIMP             |
| KETOROLAC TROMETHAMINE   | RENIMP             |
| TORADOL                  | RENIMP             |
| LISINOPRIL               | RENIMP             |
| PRINIVIL                 | RENIMP             |
| PRINZIDE                 | RENIMP             |
| ZESTRIL                  | RENIMP             |
| MEFENAMIC ACID           | RENIMP             |
| PONSTEL                  | RENIMP             |
| MELOXICAM                | RENIMP             |
| MOBIC                    | RENIMP             |
| NABUMETONE               | RENIMP             |
| RELAFEN                  | RENIMP             |
| ALEVE                    | RENIMP             |
| EC-NAPROSYN              | RENIMP             |
| NAPRELAN                 | RENIMP             |
| NAPROSYN                 | RENIMP             |
| NAPROXEN                 | RENIMP             |
| NAPROXEN SODIUM          | RENIMP             |
| NEOMYCIN                 | RENIMP             |
| DAYPRO                   | RENIMP             |
| OXAPROZIN                | RENIMP             |
| FELDENE                  | RENIMP             |
| PIROXICAM                | RENIMP             |
| ROFECOXIB                | RENIMP             |
| VIOXX                    | RENIMP             |
| STREPTOMYCIN             | RENIMP             |
| CLINORIL                 | RENIMP             |

**Table S17. Severe Adverse Event Classes**

| <b>AERS Drug Term</b>     | <b>Event Class</b> |
|---------------------------|--------------------|
| SULINDAC                  | RENIMP             |
| TOBI                      | RENIMP             |
| TOBRAMYCIN                | RENIMP             |
| TOBRAMYCIN SULFATE        | RENIMP             |
| TOBREX                    | RENIMP             |
| BEXTRA                    | RENIMP             |
| VALDECOXIB                | RENIMP             |
| CELEXA                    | SUIC               |
| CITALOPRAM                | SUIC               |
| CITALOPRAM HYDROBROMIDE   | SUIC               |
| ESCITALOPRAM              | SUIC               |
| ESCITALOPRAM OXALATE      | SUIC               |
| LEXAPRO                   | SUIC               |
| FLUOXETINE                | SUIC               |
| FLUOXETINE HYDROCHLORIDE  | SUIC               |
| PROZAC                    | SUIC               |
| SARAFEM                   | SUIC               |
| NEFAZODONE HYDROCHLORIDE  | SUIC               |
| SERZONE                   | SUIC               |
| PAROXETINE                | SUIC               |
| PAROXETINE HCL            | SUIC               |
| PAROXETINE HYDROCHLORIDE  | SUIC               |
| PAROXETINE MESYLATE       | SUIC               |
| PAXIL                     | SUIC               |
| PAXIL CR                  | SUIC               |
| PEXEVA                    | SUIC               |
| EMSAM                     | SUIC               |
| SELEGILINE HYDROCHLORIDE  | SUIC               |
| ZELAPAR                   | SUIC               |
| SERTRALINE                | SUIC               |
| SERTRALINE HYDROCHLORIDE  | SUIC               |
| ZOLOFT                    | SUIC               |
| EFFEXOR                   | SUIC               |
| EFFEXOR XR                | SUIC               |
| VENLAFAXINE HYDROCHLORIDE | SUIC               |
| CYMBALTA                  | SUIC               |
| DULOXETINE HYDROCHLORIDE  | SUIC               |
